# Supplementary material for: Parallel bimodal single-cell sequencing of transcriptome and chromatin accessibility
Source: HighWire-hosted journal article supplement (doi:10.1101/gr.257840.119), 2020-07-01
Supplement: Supplemental_Codes.zip [file Protocol Worksheet ASTAR-Cell Load.pdf › Supplemental Code/ASTAR script/Protocol Worksheet ASTAR-Cell Load.pdf]

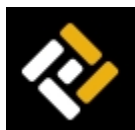

## Cell Load

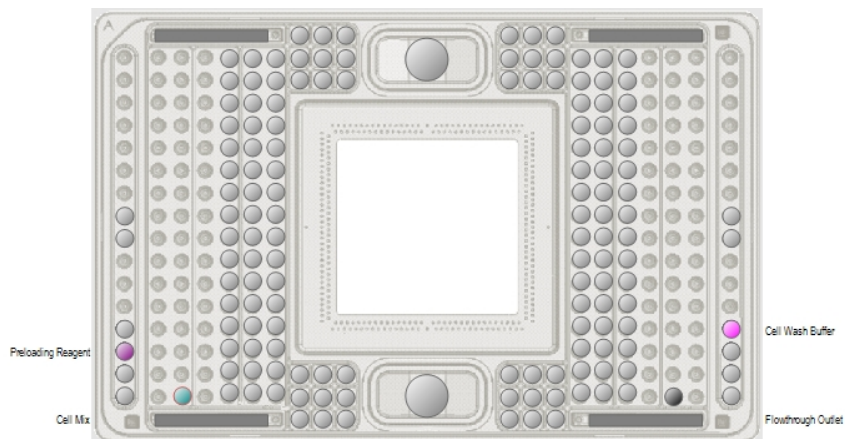

## Script Run Time

| Barcode                         | Estimate            |
|---------------------------------|---------------------|
| 1861x (5-10 um diameter cells)  | 0 hours, 15 minutes |
| 1862x (10-17 um diameter cells) | 0 hours, 30 minutes |
| 1863x (17-25 um diameter cells) | 0 hours, 27 minutes |

## Inlet Reuse

| Name                 | Chip Inlet | Instructions                                                 |
|----------------------|------------|--------------------------------------------------------------|
| ● Cell Mix           | C1         | Aspirate inlet prior to loading reagents                     |
| ● Flowthrough Outlet | C2         | Aspirate inlet prior to loading reagents (1862x, 1863x only) |

## Reagent Loading

| Name                 | Volume | Chip Inlet | Notes |
|----------------------|--------|------------|-------|
| ● Preloading Reagent | 20 µl  | 2          |       |
| ● Cell Wash Buffer   | 7 µl   | 5          |       |
| ● Cell Mix           | 5 µl   | C1         |       |
