# Supplementary material for: Parallel bimodal single-cell sequencing of transcriptome and chromatin accessibility
Source: HighWire-hosted journal article supplement (doi:10.1101/gr.257840.119), 2020-07-01
Supplement: Supplemental_Codes.zip [file Protocol Worksheet ASTAR.pdf › Supplemental Code/ASTAR script/Protocol Worksheet ASTAR.pdf]

Name ASTAR  
Version 1  
Description Chromatin accessibility and transcriptome

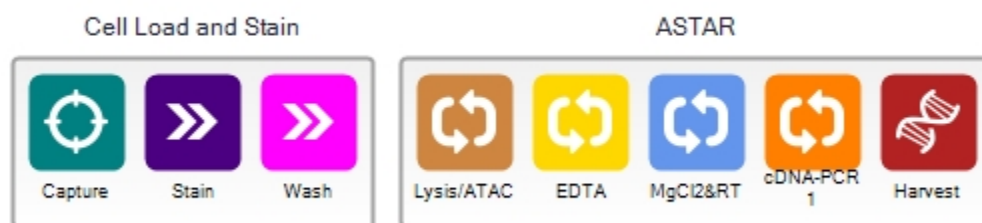

## Prime

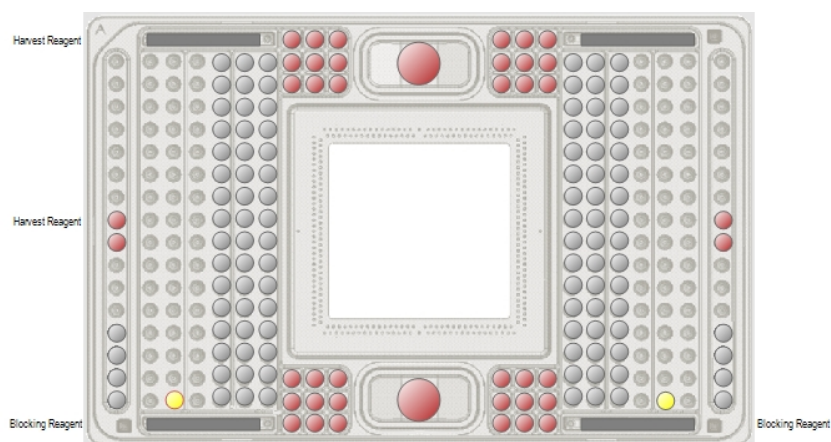

## Script Run Time

| Barcode                         | Estimate            |
|---------------------------------|---------------------|
| 1861x (5-10 um diameter cells)  | 0 hours, 11 minutes |
| 1862x (10-17 um diameter cells) | 0 hours, 12 minutes |
| 1863x (17-25 um diameter cells) | 0 hours, 12 minutes |

## Reagent Loading

| Name               | Volume | Chip Inlet | Notes |
|--------------------|--------|------------|-------|
| ● Harvest Reagent  | 200 µl | A1         |       |
| ● Harvest Reagent  | 200 µl | A2         |       |
| ● Blocking Reagent | 15 µl  | C1         |       |
| ● Blocking Reagent | 15 µl  | C2         |       |
| ● Harvest Reagent  | 20 µl  | P1         |       |
| ● Harvest Reagent  | 20 µl  | P2         |       |

## Cell Load and Stain

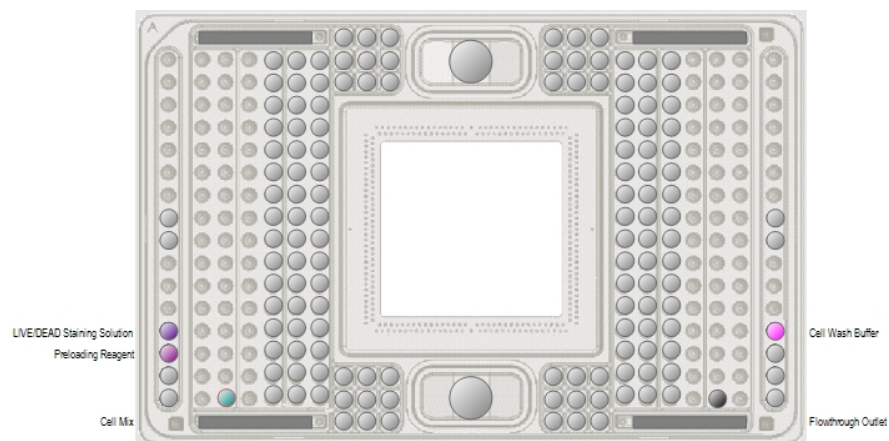

### Script Run Time

| Barcode                         | Estimate            |
|---------------------------------|---------------------|
| 1861x (5-10 um diameter cells)  | 0 hours, 31 minutes |
| 1862x (10-17 um diameter cells) | 0 hours, 55 minutes |
| 1863x (17-25 um diameter cells) | 0 hours, 51 minutes |

### Inlet Reuse

| Name                 | Chip Inlet | Instructions                                                 |
|----------------------|------------|--------------------------------------------------------------|
| ● Cell Mix           | C1         | Aspirate inlet prior to loading reagents                     |
| ● Flowthrough Outlet | C2         | Aspirate inlet prior to loading reagents (1862x, 1863x only) |

### Reagent Loading

| Name                          | Volume                                                                                    | Chip Inlet | Notes |
|-------------------------------|-------------------------------------------------------------------------------------------|------------|-------|
| ● LIVE/DEAD Staining Solution | 7 µl                                                                                      | 1          |       |
| ● Preloading Reagent          |  20 µl | 2          |       |
| ● Cell Wash Buffer            | 7 µl                                                                                      | 5          |       |
| ● Cell Mix                    |  5 µl  | C1         |       |

## ASTAR

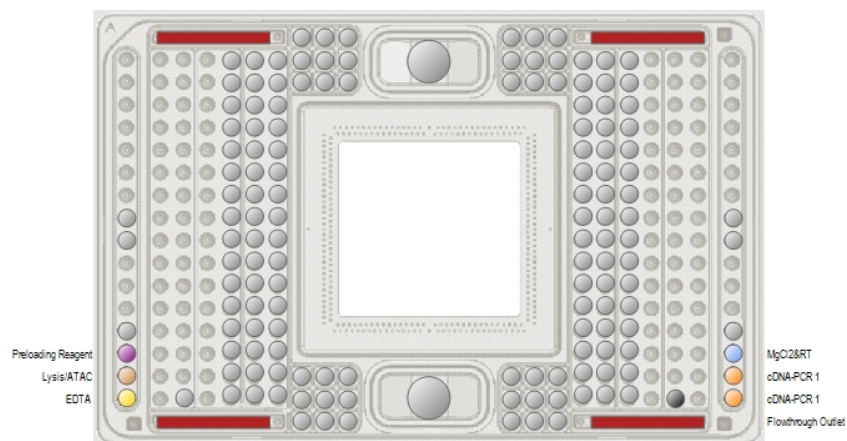

### Script Run Time

| Barcode                         | Estimate            |
|---------------------------------|---------------------|
| 1861x (5-10 um diameter cells)  | 6 hours, 40 minutes |
| 1862x (10-17 um diameter cells) | 6 hours, 40 minutes |
| 1863x (17-25 um diameter cells) | 6 hours, 40 minutes |

### Inlet Reuse

| Name                 | Chip Inlet | Instructions                                                 |
|----------------------|------------|--------------------------------------------------------------|
| ● Preloading Reagent | 2          | Aspirate inlet prior to loading reagents                     |
| ● Flowthrough Outlet | C2         | Aspirate inlet prior to loading reagents (1862x, 1863x only) |

### Reagent Loading

| Name                 | Volume      | Chip Inlet     | Notes |
|----------------------|-------------|----------------|-------|
| ● Preloading Reagent | 20 µl       | 2              |       |
| ● Lysis/ATAC         | 7 µl        | 3              |       |
| ● EDTA               | 7 µl        | 4              |       |
| ● MgCl2&RT           | 7 µl        | 6              |       |
| ● cDNA-PCR 1         | 24 µl       | 7              |       |
| ● cDNA-PCR 1         | 24 µl       | 8              |       |
| ● Harvest Reagent    | 180 µl each | Harvest Inlets |       |
