# Supplementary material for: Parallel bimodal single-cell sequencing of transcriptome and chromatin accessibility
Source: HighWire-hosted journal article supplement (doi:10.1101/gr.257840.119), 2020-07-01
Supplement: Supplemental_Legends.docx [file Supplemental_Legends.docx]

**INVENTORY OF SUPPLLEMENTAL MATERIALS**

**Parallel Bimodal Single-cell Sequencing of Transcriptome and Chromatin Accessibility**

Qiao Rui Xing1,2,11, Chadi A El Farran1,3,11, Ying Ying Zeng1,2, Yao Yi1,3, Tushar Warrier1,3, Pradeep Gautam1,3, James J. Collins4,5,6,7, Jian Xu3, Hu Li8,*, Li-Feng Zhang2, Yuin-Han Loh1,3,9,10,*

**SUPPLLEMENTAL FIGURES**

**Supplemental Figure 1.** Earlier prototype and optimization of ASTAR-seq platform

**Supplemental Figure 2.** Comparison with other multi-modal single-cell techniques for chromatin accessibility and transcriptome

**Supplemental Figure 3.** Heterogeneity of mESC and 2i cells in terms of chromatin accessibility and transcriptome

**Supplemental Figure 4.** Joint analysis of ASTAR-seq

**Supplemental Figure 5.** Transcriptome and chromatin accessibility landscape of 2C-like mESCs

**Supplemental Figure 6.** Quality control for ASTAR-seq libraries of human cell lines

**Supplemental Figure 7.** Characterization of cells belonging to each NMF cluster

**SUPPLEMENTAL METHODS**

**SUPPLLEMENTAL TABLES**

**Supplemental Table 1.**

(a) Summary of quality control parameters of K562 ASTAR ATAC-seq libraries. (b) Summary of quality control parameters of K562 ASTAR RNA-seq libraries. (c) QC filtration summary of K562 ASTAR ATAC-seq and ASTAR RNA-seq libraries.

**Supplemental Table 2.**

(a) Summary of quality control parameters of mouse ASTAR ATAC-seq libraries. (b) Summary of quality control parameters of mouse ASTAR RNA-seq libraries. (c) QC filtration summary of ASTAR ATAC-seq and ASTAR RNA-seq libraries. (d) List of variable motifs in terms of the accessibility across mESCs and 2i cells. (e) List of highly expressed genes and coordinates of the corresponding highly accessible regions for each NMF cluster. (f) List of pathways enriched by cluster 1 NMF genes through interactome analysis and list of cluster 1 NMF genes contributed to the pathway enrichment. (g) List of pathways enriched by cluster 2 NMF genes through interactome analysis and list of cluster 2 NMF genes contributed to the pathway enrichment. (h) List of motifs enriched on the differential accessible regions of NMF clusters.

**Supplemental Table 3.**

(a) Summary of quality control parameters of ASTAR ATAC-seq libraries of human cell lines. (b) Summary of quality control parameters of ASTAR RNA-seq libraries of human cell lines. (c) QC filtration summary of ASTAR ATAC-seq and ASTAR RNA-seq libraries. (d) List of variable motifs in terms of the accessibility across the profiled human cell lines. (e) List of differentially accessible TF motifs across the profiled human cell lines.

**Supplemental Table 4.**

(a) Summary of quality control parameters of ASTAR ATAC-seq libraries of erythroblast differentiation cells. (b) Summary of quality control parameters of ASTAR RNA-seq libraries of erythroblast differentiation cells. (c) QC filtration summary of ASTAR ATAC-seq and ASTAR RNA-seq libraries. (d) List of variable motifs in terms of the accessibility across the cells undergoing erythroblast differentiation. (e) List of differentially expressed genes for each NMF cluster. (f) List of motifs enriched on the differential accessible regions of NMF clusters.

**Supplemental Table 5.**

List of primers used for ASTAR-seq library preparation.

**SUPPLEMENTAL CODES**

**ASTAR scripts**

C1 scripts and work sheets for performing ASTAR-seq on Fluidigm C1 Open App microfluidic chips.

**Bioinformatic scripts**

Detailed scripts that have been used to perform the analyses shown in the manuscript.
